# Supplementary material
Source: publisher site journal article supplement (https://www.dovepress.com/article/554449)
Supplement: Supplementary file 1 [file 554449%20Supplementary%20Table%201_1.docx]

**Supplementary Table 1. Association Between Histopathological Features, p16, and p62 Expression.**

| **Variable** | **P16** | | **OR**  **(95% CI)** | **p-value** | **P62** | | **OR**  **(95% CI)** | **p-value** |
| --- | --- | --- | --- | --- | --- | --- | --- | --- |
| **Block-positive** | **Non-block** | **High** | **Low** |
| **n (%)** | **n (%)** | **n (%)** | **n (%)** |
| **Histopathological Feature** | | | | | | | | |
| **Lesion morphology** |  |  | 1.385  (0.288–6.663) | 0.647 |  |  | 1.232  (0.257–5.916 | 1.000 |
| Exophytic | 48 (92.3%) | 26 (89.7%) | 46 (92.0%) | 28 (90.3%) |
| Flat | 4 (7.7%) | 3 (10.3%) | 4 (8.0%) | 3 (9.7%) |
| **Hyperkeratosis** |  |  | 1.103  (0.614–1.980) | 0.582 |  |  | 0.730  (0.415–1.284) | 0.342 |
| Mild | 9 (17.3%) | 6 (20.7%) | 7 (14.0%) | 8 (25.8%) |
| Moderate | 12 (23.1%) | 3 (10.3%) | 10 (20.0%) | 5 (16.1%) |
| Severe | 31 (59.6%) | 20 (69.0%) | 33 (66.0%) | 18 (58.1%) |
| **Parakeratosis** |  |  | 0.928  (0.542–1.588) | 0.785 |  |  | 0.803  (0.471–1.368) | 0.421 |
| Mild | 16 (30.8%) | 13 (44.8%) | 13 (26.0%) | 16 (51.6%) |
| Moderate | 19 (36.5%) | 4 (13.8%) | 21 (42.0%) | 2 (6.5%) |
| Severe | 17 (32.7%) | 12 (41.4%) | 16 (32.0%) | 13 (41.9%) |
| **Koilocytosis** |  |  | 0.656  (0.396–1.086) | 0.114 |  |  | 0.886  (0.541–1.453) | 0.645 |
| Mild | 13 (25.0%) | 13 (44.8%) | 15 (30.0%) | 11 (35.5%) |
| Moderate | 8 (15.4%) | 3 (10.3%) | 7 (14.0%) | 4 (12.9%) |
| Severe | 31 (59.6%) | 13 (44.8%) | 28 (56.0%) | 16 (51.6%) |
| **Atypical Mitosis** |  |  | 0.555  (0.320–0.962) | 0.034* |  |  | 0.556  (0.323–0.956) | 0.033* |
| Absent | 13 (25.0%) | 13 (44.8%) | 12 (24.0%) | 14 (45.2%) |
| Mild | 13 (25.0%) | 8 (27.6%) | 13 (26.0%) | 8 (25.8%) |
| Moderate-Severe | 26 (50.0%) | 8 (27.6%) | 25 (50.0%) | 9 (29.0%) |
| **Lymphocytic infiltration** | |  | 1.095  (0.653–1.836) | 0.737 |  |  | 0.791  (0.471–1.329) | 0.389 |
| Mild | 25 (48.1%) | 13 (44.8%) | 22 (44.0%) | 16 (51.6%) |
| Moderate | 11 (21.2%) | 6 (20.7%) | 10 (20.0%) | 7 (22.6%) |
| Severe | 16 (30.8%) | 10 (34.5%) | 18 (36.0%) | 8 (25.8%) |
| ***Description:*** *Associations were analyzed using the Chi-square or Fisher’s exact test. A p-value <0.05 was considered statistically significant. *p <0.05.* | | | | | | | | |
